# Supplementary material for: Weight change across adulthood in relation to all cause and cause specific mortality: prospective cohort study
Source: PubMed Central journal article supplement — BMJ. 2019 Oct 16;367:l5584. doi: 10.1136/bmj.l5584 (PMC6812615; doi:10.1136/bmj.l5584), 2019-10-16
Supplement: chec050369.ww1.pdf [file chec050369.ww1.pdf]

## **Supplement Materials**

### **Supplementary tables**

Table A The definition of weight change patterns using the period of age 25 years to ten years before baseline as an example

Table B Correlation coefficients for BMI at three time points and absolute weight changes during three intervals

Table C Baseline characteristics of study participants in the NHANES 1988-2014 according to weight change patterns from age 25 years to ten years before baseline

Table D Baseline characteristics of study participants in the NHANES 1988-2014 according to weight change patterns in the ten years period before baseline

Table E Hazard ratios of all cause mortality with BMI status at different time points in the NHANES 1988-2014

Table F Hazard ratios of CVD mortality, heart disease mortality and stroke mortality with weight change patterns across adulthood in the NHANES 1988-2010

Table G Hazard ratios of all cause and cause specific mortality with weight change patterns across adulthood in the NHANES 1988-2014 with further adjustment of baseline disease status

Table H Sensitivity analyses of the associations between weight change patterns across adulthood and risks of all cause mortality in the NHANES 1988-2014

Table I Hazard ratios of all cause mortality with weight change patterns stratified by age at death among participants younger than 65 years old at baseline in the NHANES 1988-2014

### **Supplementary figures**

Figure A Flow chart of inclusion and exclusion of participants

Figure B Associations between fine weight change patterns across adulthood and all cause mortality in the

NHANES 1988-2014

Figure C Dose response associations between weight change across adulthood and risk of cause specific mortality in the NHANES 1988-2014

**Table A The definition of weight change patterns using the period of age 25 years to ten years before baseline as an example**

| BMI at age 25 years       | BMI at ten years before baseline |                           |                       |
|---------------------------|----------------------------------|---------------------------|-----------------------|
|                           | <25 kg/m <sup>2</sup>            | 25-29.9 kg/m <sup>2</sup> | ≥30 kg/m <sup>2</sup> |
| <25 kg/m <sup>2</sup>     | Stable normal                    | Maximum overweight        | Non-obese to obese    |
| 25-29.9 kg/m <sup>2</sup> | Maximum overweight               | Maximum overweight        | Non-obese to obese    |
| ≥30 kg/m <sup>2</sup>     | Obese to non-obese               | Obese to non-obese        | Stable obese          |

**Table B Correlation coefficients for BMI at three time points and absolute weight changes during three intervals**

|                                                             | BMI             |                              |             | Absolute weight change                        |                               |                                            |
|-------------------------------------------------------------|-----------------|------------------------------|-------------|-----------------------------------------------|-------------------------------|--------------------------------------------|
|                                                             | At age 25 years | At ten years before baseline | At baseline | From age 25 years to ten year before baseline | From age 25 years to baseline | From ten years before baseline to baseline |
| BMI at age 25 years                                         | 1.00            | -                            | -           | -                                             | -                             | -                                          |
| BMI at ten years before baseline                            | 0.63            | 1.00                         | -           | -                                             | -                             | -                                          |
| BMI at baseline                                             | 0.46            | 0.69                         | 1.00        | -                                             | -                             | -                                          |
| Weight change from age 25 years to ten year before baseline | -0.15           | 0.67                         | 0.44        | 1.00                                          | -                             | -                                          |
| Weight change from age 25 years to baseline                 | -0.24           | 0.28                         | 0.75        | 0.59                                          | 1.00                          | -                                          |
| Weight change from ten years before baseline to baseline    | -0.15           | -0.30                        | 0.48        | -0.23                                         | 0.65                          | 1.00                                       |

**Table C Baseline characteristics of study participants in the NHANES 1988-2014 according to weight change patterns from age 25 years to ten years before baseline\***

| Characteristics <sup>†</sup>      | Total               | Weight change patterns from age 25 years to ten years before baseline |                     |                        |                     |                     | P value <sup>‡</sup> |
|-----------------------------------|---------------------|-----------------------------------------------------------------------|---------------------|------------------------|---------------------|---------------------|----------------------|
|                                   |                     | Stable normal                                                         | Maximum overweight  | Obese to non-obese     | Non-obese to obese  | Stable obese        |                      |
| No. of participants, n (%)        | 33 300              | 12 154 (42.3)                                                         | 12 760 (36.1)       | 399 (1.2)              | 6083 (15.3)         | 1904 (5.2)          |                      |
| Age, years                        | 57.1 (56.7 to 57.4) | 55.0 (54.5 to 55.5)                                                   | 58.7 (58.3 to 59.2) | 58.0 (56.6 to 59.3)    | 59.8 (59.3 to 60.2) | 54.2 (53.6 to 54.9) | <0.001               |
| Women                             | 16 819 (52.7)       | 7323 (64.9)                                                           | 5280 (40.7)         | 156 (37.0)             | 3145 (51.1)         | 915 (45.4)          | <0.001               |
| BMI, kg/m <sup>2</sup>            |                     |                                                                       |                     |                        |                     |                     |                      |
| At age 25 years.                  | 23.4 (23.4 to 23.5) | 20.9 (20.8 to 20.9)                                                   | 23.9 (23.8 to 24.0) | 33.2 (32.6 to 33.8)    | 25.1 (25.0 to 25.2) | 34.6 (34.3 to 34.8) | <0.001               |
| At 10 years before baseline       | 26.6 (26.5 to 26.7) | 22.2 (22.1 to 22.2)                                                   | 27.0 (27.0 to 27.1) | 26.8 (26.3 to 27.2)    | 33.8 (33.6 to 34.0) | 38.2 (37.7 to 38.6) | <0.001               |
| At survey                         | 28.2 (28.1 to 28.4) | 24.4 (24.3 to 24.5)                                                   | 28.8 (28.7 to 28.9) | 29.3 (28.4 to 30.2)    | 34.0 (33.8 to 34.2) | 38.1 (37.6 to 38.5) | <0.001               |
| Absolute weight change, kg        | 8.8 (8.6 to 9.0)    | 3.7 (3.6 to 3.8)                                                      | 8.9 (8.6 to 9.1)    | -18.4 (-20.6 to -16.1) | 24.2 (23.5 to 24.9) | 10.2 (8.9 to 11.4)  |                      |
| Race                              |                     |                                                                       |                     |                        |                     |                     | <0.001               |
| Non-Hispanic White                | 16 989 (78.1)       | 6465 (79.0)                                                           | 6544 (78.4)         | 207 (78.6)             | 2910 (76.0)         | 863 (75.5)          |                      |
| Non-Hispanic Black                | 7180 (9.6)          | 2453 (8.4)                                                            | 2568 (9.4)          | 81 (9.4)               | 1494 (12.1)         | 584 (14.8)          |                      |
| Mexican American                  | 5608 (4.3)          | 1658 (3.2)                                                            | 2360 (4.9)          | 79 (4.4)               | 1185 (5.6)          | 326 (5.2)           |                      |
| Others                            | 3523 (7.9)          | 1578 (9.4)                                                            | 1288 (7.3)          | 32 (7.7)               | 494 (6.3)           | 131 (4.6)           |                      |
| Education level                   |                     |                                                                       |                     |                        |                     |                     | <0.001               |
| Less than high school             | 10 958 (22.4)       | 3536 (19.6)                                                           | 4329 (23.3)         | 174 (28.6)             | 2259 (27.0)         | 660 (23.0)          |                      |
| High school or equivalent         | 8352 (28.4)         | 3108 (27.8)                                                           | 3149 (28.3)         | 93 (29.1)              | 1529 (29.5)         | 473 (30.1)          |                      |
| College or above                  | 13 916 (49.3)       | 5482 (52.5)                                                           | 5255 (48.4)         | 131 (42.2)             | 2284 (43.5)         | 764 (46.9)          |                      |
| Family income-poverty ratio level |                     |                                                                       |                     |                        |                     |                     | <0.001               |
| 0-1.0                             | 5295 (10.0)         | 1898 (9.8)                                                            | 1907 (9.3)          | 80 (11.4)              | 1033 (11.1)         | 377 (13.1)          |                      |
| 1.1-3.0                           | 13 085 (36.3)       | 4464 (33.8)                                                           | 5039 (36.0)         | 164 (46.3)             | 2585 (40.9)         | 833 (43.6)          |                      |
| >3.0                              | 12 193 (53.6)       | 4767 (56.4)                                                           | 4755 (54.7)         | 130 (42.3)             | 1978 (48.0)         | 563 (43.3)          |                      |
| Marital status                    |                     |                                                                       |                     |                        |                     |                     | <0.001               |
| Married                           | 20 999 (69.2)       | 7631 (69.1)                                                           | 8309 (71.1)         | 242 (67.5)             | 3722 (66.4)         | 1095 (65.9)         |                      |
| Separated                         | 9809 (25.1)         | 3545 (25.1)                                                           | 3600 (23.8)         | 124 (25.5)             | 1984 (28.8)         | 556 (22.6)          |                      |
| Never married                     | 2177 (5.7)          | 866 (5.9)                                                             | 716 (5.1)           | 30 (7.0)               | 329 (4.7)           | 236 (11.6)          |                      |
| Alcohol drinking                  |                     |                                                                       |                     |                        |                     |                     | <0.001               |
| Non-drinker                       | 12 160 (38.3)       | 4352 (37.6)                                                           | 4450 (36.5)         | 147 (46.1)             | 2475 (43.0)         | 736 (40.9)          |                      |
| Low-to-moderate drinker           | 16 409 (52.3)       | 5843 (51.9)                                                           | 6471 (53.5)         | 197 (47.9)             | 2945 (50.6)         | 953 (53.2)          |                      |
| Heavy drinker                     | 2583 (9.4)          | 1111 (10.5)                                                           | 1029 (10.0)         | 30 (6.0)               | 310 (6.4)           | 103 (5.9)           |                      |
| Smoking status                    |                     |                                                                       |                     |                        |                     |                     | <0.001               |
| Never smoker                      | 15 809 (45.9)       | 5664 (45.3)                                                           | 6011 (45.4)         | 144 (35.3)             | 3020 (48.2)         | 970 (49.2)          |                      |

|                                            |               |             |             |            |             |             |        |
|--------------------------------------------|---------------|-------------|-------------|------------|-------------|-------------|--------|
| Former smoker                              | 10 801 (33.2) | 3503 (30.5) | 4436 (35.7) | 165 (40.5) | 2139 (34.6) | 558 (31.7)  |        |
| Current smoker                             | 6676 (21.0)   | 2979 (24.2) | 2309 (18.9) | 90 (24.2)  | 923 (17.2)  | 375 (19.1)  |        |
| Leisure-time physical activity level       |               |             |             |            |             |             | <0.001 |
| 0 times/week                               | 15 975 (37.7) | 5352 (33.9) | 5943 (36.6) | 216 (40.7) | 3359 (46.4) | 1105 (49.9) |        |
| 1-2 times/week                             | 6454 (25.5)   | 2501 (27.1) | 2524 (25.3) | 63 (20.9)  | 1058 (22.7) | 308 (22.2)  |        |
| ≥3 times/week                              | 10853 (36.8)  | 4297 (39.0) | 4281 (38.0) | 120 (38.4) | 1666 (30.9) | 489 (27.8)  |        |
| Healthy eating index scores                |               |             |             |            |             |             | <0.001 |
| Quartile 1                                 | 7915 (24.7)   | 2792 (23.7) | 2942 (23.9) | 113 (31.9) | 1495 (26.9) | 573 (29.3)  |        |
| Quartile 2                                 | 7902 (24.7)   | 2863 (24.8) | 2996 (24.2) | 91 (24.2)  | 1472 (25.7) | 480 (25.4)  |        |
| Quartile 3                                 | 7906 (24.5)   | 2795 (23.4) | 3126 (26.2) | 84 (19.7)  | 1467 (23.7) | 434 (24.9)  |        |
| Quartile 4                                 | 7905 (26.1)   | 3028 (28.0) | 3077 (25.7) | 87 (24.1)  | 1374 (23.8) | 339 (20.3)  |        |
| Family history of diabetes or heart attack | 16 574 (50.0) | 5553 (47.0) | 6214 (48.6) | 218 (60.4) | 3437 (57.2) | 1152 (60.4) | <0.001 |
| Self-reported health                       |               |             |             |            |             |             | <0.001 |
| Very good to excellent                     | 12 362 (46.2) | 5399 (53.5) | 4777 (45.7) | 115 (31.7) | 1621 (33.4) | 450 (31.3)  |        |
| Good                                       | 11 612 (33.5) | 4022 (30.0) | 4547 (34.9) | 145 (35.9) | 2226 (38.2) | 672 (37.8)  |        |
| Poor to fair                               | 9310 (20.3)   | 2729 (16.5) | 3430 (19.4) | 139 (32.4) | 2230 (28.4) | 782 (30.9)  |        |
| Self-reported chronic diseases             |               |             |             |            |             |             |        |
| Diabetes                                   | 4853 (10.2)   | 700 (4.0)   | 1742 (10.0) | 91 (12.6)  | 1702 (22.3) | 618 (27.1)  | <0.001 |
| Hypertension                               | 12 306 (32.3) | 3080 (21.2) | 4853 (34.8) | 145 (30.7) | 3227 (50.0) | 1001 (52.8) | <0.001 |
| Cardiovascular diseases                    | 5044 (11.6)   | 1241 (7.4)  | 2045 (13.2) | 89 (20.4)  | 1261 (17.5) | 408 (16.6)  | <0.001 |
| Chronic obstructive pulmonary diseases     | 2990 (9.5)    | 1095 (9.4)  | 990 (8.1)   | 48 (17.2)  | 660 (12.3)  | 197 (10.4)  | <0.001 |
| Cancer <sup>§</sup>                        | 3173 (8.6)    | 1004 (7.7)  | 1302 (9.1)  | 42 (10.1)  | 665 (10.1)  | 160 (6.8)   | <0.001 |

\*Complex survey designs are considered for all estimates; data are presented as No. (%) for categorical variables and mean (95% confidence interval) for continuous variables. Among the 36 051 participants, a total of 2751 participants were excluded in the analyses due to missing values of BMI at both times.

†A total of 74, 2727, 315, 2148, 14, 18, 1672 and 16 participants had missing information on education, family income poverty ratio, marital status, alcohol drinking, smoking status, leisure-time physical activity level, healthy eating index score and self-reported health respectively.

‡For categorical variables, *P* value was calculated by Rao-Scott chi-square test, which is a design-adjusted version of Pearson chi-square test. For continuous variables, ANOVA adjusting for sampling weights was used to calculate *P* value.

§Skin cancer was not included.

**Table D Baseline characteristics of study participants in the NHANES 1988-2014 according to weight change patterns in ten years period before baseline \***

| Characteristics <sup>†</sup> | Total               | Weight change patterns from ten years before baseline to baseline |                     |                        |                     |                     | P value <sup>‡</sup> |
|------------------------------|---------------------|-------------------------------------------------------------------|---------------------|------------------------|---------------------|---------------------|----------------------|
|                              |                     | Stable normal                                                     | Maximum overweight  | Obese to non-obese     | Non-obese to obese  | Stable obese        |                      |
| No. of participants, n (%)   | 34 582              | 7785 (26.9)                                                       | 12 932 (37.2)       | 1982 (4.2)             | 5502 (15.4)         | 6381 (16.3)         |                      |
| Age, years                   | 57.2 (56.8 to 57.6) | 56.3 (55.7 to 56.9)                                               | 58.1 (57.6 to 58.6) | 61.6 (60.5 to 62.6)    | 54.9 (54.4 to 55.4) | 57.7 (57.3 to 58.2) | 0.92                 |
| Women                        | 17 545 (52.8)       | 4370 (63.4)                                                       | 5578 (44.3)         | 867 (42.7)             | 3273 (58.6)         | 3457 (52.2)         | <0.001               |
| BMI, kg/m <sup>2</sup>       |                     |                                                                   |                     |                        |                     |                     |                      |
| At age 25 years              | 23.4 (23.3 to 23.5) | 20.8 (20.7 to 20.9)                                               | 23.0 (22.9 to 23.1) | 25.8 (25.4 to 26.1)    | 23.7 (23.6 to 23.9) | 27.9 (27.6 to 28.2) | <0.001               |
| At 10 years before baseline  | 26.6 (26.5 to 26.7) | 21.6 (21.6 to 21.7)                                               | 25.5 (25.5 to 25.6) | 32.9 (32.6 to 33.2)    | 26.8 (26.7 to 26.9) | 35.5 (35.2 to 35.7) | <0.001               |
| At survey                    | 28.2 (28.1 to 28.3) | 22.1 (22.0 to 22.2)                                               | 26.8 (26.7 to 26.8) | 27.5 (27.3 to 27.6)    | 33.3 (33.2 to 33.5) | 36.9 (36.7 to 37.1) | <0.001               |
| Absolute weight change, kg   | 4.4 (4.2 to 4.7)    | 1.3 (1.1 to 1.5)                                                  | 3.5 (3.2 to 3.7)    | -15.1 (-15.9 to -14.4) | 18.2 (17.7 to 18.6) | 4.0 (3.5 to 4.6)    |                      |
| Race                         |                     |                                                                   |                     |                        |                     |                     | <0.001               |
| Non-Hispanic White           | 17 375 (77.6)       | 4422 (80.6)                                                       | 6670 (78.5)         | 865 (73.2)             | 2419 (73.5)         | 2999 (75.8)         |                      |
| Non-Hispanic Black           | 7477 (9.8)          | 1399 (7.0)                                                        | 2433 (8.7)          | 484 (13.7)             | 1457 (13.0)         | 1704 (12.9)         |                      |
| Mexican American             | 5992 (4.5)          | 862 (2.4)                                                         | 2394 (4.7)          | 468 (6.8)              | 1094 (5.9)          | 1174 (5.4)          |                      |
| Others                       | 3738 (8.1)          | 1102 (10.0)                                                       | 1435 (8.1)          | 165 (6.3)              | 532 (7.7)           | 504 (5.8)           |                      |
| Education                    |                     |                                                                   |                     |                        |                     |                     | <0.001               |
| Less than high school        | 11 810 (23.2)       | 2273 (19.1)                                                       | 4506 (23.3)         | 946 (35.5)             | 1849 (24.7)         | 2236 (24.8)         |                      |
| High school or equivalent    | 8532 (28.1)         | 1922 (26.5)                                                       | 3152 (28.2)         | 443 (27.4)             | 1396 (29.0)         | 1619 (29.8)         |                      |
| College or above             | 14 153 (48.7)       | 3560 (54.4)                                                       | 5243 (48.5)         | 586 (37.1)             | 2250 (46.3)         | 2514 (45.4)         |                      |
| Family income-poverty ratio  |                     |                                                                   |                     |                        |                     |                     | <0.001               |
| 0-1.0                        | 5687 (10.4)         | 1198 (9.2)                                                        | 1976 (9.5)          | 431 (15.7)             | 972 (12.2)          | 1110 (11.1)         |                      |
| 1.1-3.0                      | 13 562 (36.6)       | 2834 (33.8)                                                       | 5017 (35.1)         | 887 (45.0)             | 2155 (37.9)         | 2669 (41.0)         |                      |
| >3.0                         | 12 357 (53.1)       | 3091 (57.0)                                                       | 4775 (55.3)         | 474 (39.3)             | 1914 (49.9)         | 2103 (47.9)         |                      |
| Marital status               |                     |                                                                   |                     |                        |                     |                     | <0.001               |
| Married                      | 21 595 (68.6)       | 4812 (67.7)                                                       | 8387 (70.9)         | 1128 (62.7)            | 3423 (68.7)         | 3845 (66.2)         |                      |
| Separated                    | 10 355 (25.4)       | 2355 (26.0)                                                       | 3660 (23.7)         | 725 (31.8)             | 1622 (25.2)         | 1993 (26.8)         |                      |
| Never married                | 2313 (6.0)          | 548 (6.2)                                                         | 760 (5.4)           | 116 (5.5)              | 398 (6.1)           | 491 (7.0)           |                      |
| Alcohol drinking             |                     |                                                                   |                     |                        |                     |                     | <0.001               |
| Non-drinker                  | 12 796 (38.7)       | 2767 (37.1)                                                       | 4529 (36.6)         | 816 (42.9)             | 2081 (40.9)         | 2603 (43.1)         |                      |
| Low-to-moderate drinker      | 16 831 (52.0)       | 3634 (51.6)                                                       | 6502 (53.3)         | 902 (50.5)             | 2696 (51.2)         | 3097 (50.8)         |                      |
| Heavy drinker                | 2638 (9.3)          | 787 (11.3)                                                        | 1060 (10.1)         | 119 (6.6)              | 369 (8.0)           | 303 (6.1)           |                      |
| Smoking status               |                     |                                                                   |                     |                        |                     |                     | <0.001               |
| Never smoker                 | 16 533 (46.1)       | 3576 (45.6)                                                       | 6043 (45.0)         | 901 (45.5)             | 2689 (46.2)         | 3324 (49.8)         |                      |

|                                            |               |             |             |             |             |             |        |
|--------------------------------------------|---------------|-------------|-------------|-------------|-------------|-------------|--------|
| Former smoker                              | 11 119 (33.0) | 2123 (28.3) | 4406 (35.1) | 634 (30.1)  | 1807 (35.4) | 2149 (34.3) |        |
| Current smoker                             | 6915 (20.9)   | 2082 (26.1) | 2476 (19.9) | 446 (24.4)  | 1004 (18.5) | 907 (15.9)  |        |
| Leisure-time physical activity level       |               |             |             |             |             |             | <0.001 |
| 0 times/week                               | 16890 (38.3)  | 3327 (31.7) | 5986 (35.8) | 1127 (47.2) | 2832 (43.0) | 3618 (48.0) |        |
| 1-2 times/week                             | 6608 (25.3)   | 1561 (26.1) | 2559 (25.9) | 303 (20.1)  | 1072 (26.0) | 1113 (23.1) |        |
| ≥3 times/week                              | 11066 (36.4)  | 2894 (42.1) | 4379 (38.3) | 552 (32.7)  | 1593 (31.0) | 1648 (28.9) |        |
| Healthy eating index scores                |               |             |             |             |             |             | <0.001 |
| Quartile 1                                 | 8200 (24.6)   | 1695 (21.9) | 2859 (23.1) | 515 (27.5)  | 1487 (29.2) | 1644 (27.4) |        |
| Quartile 2                                 | 8193 (24.8)   | 1711 (23.3) | 3023 (24.7) | 469 (24.8)  | 1426 (26.8) | 1564 (25.9) |        |
| Quartile 3                                 | 8187 (24.4)   | 1807 (23.4) | 3165 (25.8) | 452 (23.7)  | 1247 (24.0) | 1516 (24.0) |        |
| Quartile 4                                 | 8185 (26.1)   | 2094 (31.4) | 3202 (26.4) | 438 (24.1)  | 1091 (20.0) | 1360 (22.7) |        |
| Family history of diabetes or heart attack | 17 062 (49.6) | 3288 (43.5) | 6012 (47.6) | 1058 (52.0) | 2994 (54.6) | 3710 (59.0) | <0.001 |
| Self-reported health                       |               |             |             |             |             |             | <0.001 |
| Very good to excellent                     | 12 597 (45.7) | 3603 (56.5) | 5173 (49.0) | 514 (35.0)  | 1699 (36.7) | 1608 (31.9) |        |
| Good                                       | 12 092 (33.6) | 2517 (28.6) | 4446 (32.5) | 666 (33.4)  | 2103 (39.0) | 2360 (39.2) |        |
| Poor to fair                               | 9876 (20.7)   | 1663 (14.9) | 3309 (18.5) | 800 (31.6)  | 1695 (24.3) | 2409 (28.8) |        |
| Self-reported chronic diseases             |               |             |             |             |             |             |        |
| Diabetes                                   | 5152 (10.4)   | 413 (3.5)   | 1487 (7.7)  | 614 (23.5)  | 791 (11.2)  | 1847 (23.8) | <0.001 |
| Hypertension                               | 12 779 (32.3) | 1725 (17.3) | 4342 (29.8) | 961 (44.5)  | 2297 (40.3) | 3454 (52.2) | <0.001 |
| Cardiovascular diseases                    | 5275 (11.8)   | 855 (7.6)   | 1883 (11.5) | 509 (22.1)  | 780 (12.2)  | 1248 (16.1) | <0.001 |
| Chronic obstructive pulmonary diseases     | 3089 (9.5)    | 715 (9.6)   | 969 (7.8)   | 217 (12.4)  | 516 (10.2)  | 672 (11.5)  | <0.001 |
| Cancer§                                    | 3264 (8.5)    | 716 (8.3)   | 1248 (8.4)  | 225 (10.2)  | 447 (8.4)   | 628 (8.9)   | 0.33   |

\*Complex survey designs are considered for all estimates; data are presented as No. (%) for categorical variables and mean (95% confidence interval) for continuous variables. Among 36051 participants, a total of 1469 participants were excluded in the analyses due to missing values of BMI at ten years before baseline.

†A total of 87, 2976, 319, 2317, 15, 18, 1817 and 17 participants had missing information on education, family income poverty ratio, marital status, alcohol drinking, smoking status, leisure-time physical activity level, healthy eating index score and self-reported health respectively.

‡For categorical variables, *P* value was calculated by Rao-Scott chi-square test, which is a design-adjusted version of Pearson chi-square test. For continuous variables, ANOVA adjusting for sampling weights was used to calculate *P* value.

§Skin cancer was not included.



**Table E Hazard ratios (95% confidence intervals) of all cause mortality with BMI status at different time points in the NHANES 1988-2014 \***

|                                                                                                | <b>BMI groups</b>                |                                   |                                   |                                   |                                   |                                 |                               |
|------------------------------------------------------------------------------------------------|----------------------------------|-----------------------------------|-----------------------------------|-----------------------------------|-----------------------------------|---------------------------------|-------------------------------|
|                                                                                                | <b>&lt;18.5 kg/m<sup>2</sup></b> | <b>18.5-19.9 kg/m<sup>2</sup></b> | <b>20.0-22.4 kg/m<sup>2</sup></b> | <b>22.5-24.9 kg/m<sup>2</sup></b> | <b>25.0-29.9 kg/m<sup>2</sup></b> | <b>30-34.9 kg/m<sup>2</sup></b> | <b>≥35.0 kg/m<sup>2</sup></b> |
| <b>BMI at age 25 years</b>                                                                     |                                  |                                   |                                   |                                   |                                   |                                 |                               |
| All participants                                                                               |                                  |                                   |                                   |                                   |                                   |                                 |                               |
| Mean (95% CI)                                                                                  | 17.5 (17.4 to 17.6)              | 19.3 (19.3 to 19.3)               | 21.3 (21.3 to 21.3)               | 23.7 (23.7 to 23.7)               | 26.8 (26.8 to 26.9)               | 31.9 (31.8 to 32.0)             | 40.1 (39.5 to 40.7)           |
| No. of participants                                                                            | 1897                             | 3417                              | 9384                              | 8962                              | 7780                              | 1682                            | 658                           |
| No. of deaths/person-years                                                                     | 454/21 140                       | 877/37 188                        | 2610/99 220                       | 2648/87 997                       | 2305/72 779                       | 514/14 668                      | 173/5410                      |
| Model 1                                                                                        | 0.96 (0.85 to 1.08)              | 0.89 (0.81 to 0.99)               | 0.95 (0.89 to 1.02)               | 1.00                              | 1.10 (1.02 to 1.19)               | 1.39 (1.21 to 1.60)             | 1.78 (1.42 to 2.23)           |
| Model 2                                                                                        | 0.96 (0.84 to 1.10)              | 0.92 (0.82 to 1.02)               | 0.97 (0.90 to 1.04)               | 1.00                              | 1.10 (1.02 to 1.19)               | 1.30 (1.11 to 1.52)             | 1.58 (1.26 to 1.98)           |
| Participants with prevalent chronic diseases at 25 years old excluded <sup>†</sup>             |                                  |                                   |                                   |                                   |                                   |                                 |                               |
| No. of participants                                                                            | 1860                             | 3369                              | 9218                              | 8783                              | 7594                              | 1628                            | 612                           |
| No. of deaths                                                                                  | 441                              | 855                               | 2539                              | 2569                              | 2216                              | 488                             | 156                           |
| Model 1                                                                                        | 0.96 (0.85 to 1.09)              | 0.89 (0.80 to 0.99)               | 0.95 (0.88 to 1.02)               | 1.00                              | 1.10 (1.01 to 1.19)               | 1.41 (1.22 to 1.61)             | 1.78 (1.43 to 2.22)           |
| Never smoker                                                                                   |                                  |                                   |                                   |                                   |                                   |                                 |                               |
| No. of participants                                                                            | 969                              | 1663                              | 4996                              | 4264                              | 3542                              | 799                             | 338                           |
| No. of deaths                                                                                  | 194                              | 353                               | 1040                              | 1023                              | 886                               | 205                             | 81                            |
| Model 1                                                                                        | 0.86 (0.70 to 1.07)              | 0.88 (0.74 to 1.05)               | 0.89 (0.78 to 1.02)               | 1.00                              | 1.02 (0.89 to 1.16)               | 1.48 (1.22 to 1.79)             | 1.97 (1.44 to 2.69)           |
| <b>BMI at ten years before baseline</b>                                                        |                                  |                                   |                                   |                                   |                                   |                                 |                               |
| All participants                                                                               |                                  |                                   |                                   |                                   |                                   |                                 |                               |
| Mean (95% CI)                                                                                  | 17.4 (17.3 to 17.6)              | 19.4 (19.3 to 19.4)               | 21.4 (21.4 to 21.4)               | 23.8 (23.8 to 23.8)               | 27.2 (27.2 to 27.3)               | 32.0 (32.0 to 32.1)             | 40.5 (40.2 to 40.8)           |
| No. of participants                                                                            | 546                              | 1147                              | 4350                              | 7105                              | 13 071                            | 5480                            | 2883                          |
| No. of deaths/person-years                                                                     | 124/6034                         | 246/13 083                        | 1138/48 590                       | 1974/75 015                       | 3941/129 061                      | 1657/49 801                     | 847/23 599                    |
| Model 1                                                                                        | 1.46 (1.20 to 1.79)              | 1.06 (0.88 to 1.28)               | 1.07 (0.96 to 1.19)               | 1.00                              | 1.06 (0.99 to 1.14)               | 1.24 (1.14 to 1.34)             | 1.62 (1.43 to 1.83)           |
| Model 2                                                                                        | 1.47 (1.18 to 1.83)              | 1.08 (0.89 to 1.30)               | 1.09 (0.98 to 1.20)               | 1.00                              | 1.04 (0.96 to 1.12)               | 1.15 (1.06 to 1.26)             | 1.37 (1.20 to 1.57)           |
| Participants with prevalent chronic diseases at ten years prior baseline excluded <sup>†</sup> |                                  |                                   |                                   |                                   |                                   |                                 |                               |
| No. of participants                                                                            | 506                              | 1048                              | 3992                              | 6384                              | 11 227                            | 4488                            | 2147                          |
| No. of deaths                                                                                  | 112                              | 200                               | 962                               | 1630                              | 3114                              | 1221                            | 562                           |
| Model 1                                                                                        | 1.54 (1.27 to 1.85)              | 1.09 (0.87 to 1.37)               | 1.07 (0.96 to 1.19)               | 1.00                              | 1.06 (0.99 to 1.13)               | 1.22 (1.11 to 1.35)             | 1.72 (1.51 to 1.96)           |
| Never smoker                                                                                   |                                  |                                   |                                   |                                   |                                   |                                 |                               |
| No. of participants                                                                            | 243                              | 550                               | 2034                              | 3264                              | 6217                              | 2699                            | 1526                          |
| No. of deaths                                                                                  | 46                               | 76                                | 424                               | 722                               | 1608                              | 706                             | 395                           |
| Model 1                                                                                        | 1.89 (1.39 to 2.59)              | 0.89 (0.69 to 1.14)               | 1.17 (1.00 to 1.38)               | 1.00                              | 1.10 (0.95 to 1.27)               | 1.32 (1.14 to 1.54)             | 1.74 (1.45 to 2.08)           |

**BMI at baseline**

|                                                                                |                     |                     |                     |                     |                     |                     |                     |
|--------------------------------------------------------------------------------|---------------------|---------------------|---------------------|---------------------|---------------------|---------------------|---------------------|
| All participants                                                               |                     |                     |                     |                     |                     |                     |                     |
| Mean (95% CI)                                                                  | 17.4 (17.3 to 17.5) | 19.3 (19.3 to 19.4) | 21.4 (21.3 to 21.4) | 23.8 (23.8 to 23.8) | 27.3 (27.3 to 27.4) | 32.1 (32.0 to 32.1) | 40.2 (39.9 to 40.4) |
| No. of participants                                                            | 547                 | 909                 | 3324                | 5594                | 13 216              | 7540                | 4921                |
| No. of deaths/person-years                                                     | 275/4282            | 377/8216            | 1207/32 995         | 1763/57 749         | 3923/135 093        | 1886/74 801         | 1069/45 843         |
| Model 1                                                                        | 1.64 (1.29 to 2.08) | 1.27 (1.05 to 1.52) | 1.10 (0.97 to 1.25) | 1.00                | 0.94 (0.85 to 1.05) | 1.03 (0.91 to 1.16) | 1.35 (1.22 to 1.49) |
| Model 2                                                                        | 1.70 (1.33 to 2.17) | 1.30 (1.10 to 1.55) | 1.13 (0.99 to 1.28) | 1.00                | 0.93 (0.84 to 1.04) | 0.98 (0.87 to 1.10) | 1.19 (1.07 to 1.31) |
| Participants with prevalent chronic diseases at baseline excluded <sup>†</sup> |                     |                     |                     |                     |                     |                     |                     |
| No. of participants                                                            | 391                 | 684                 | 2489                | 4024                | 9198                | 4891                | 2881                |
| No. of deaths                                                                  | 171                 | 236                 | 735                 | 999                 | 2114                | 946                 | 463                 |
| Model 1                                                                        | 1.70 (1.29 to 2.23) | 1.28 (1.00 to 1.63) | 1.11 (0.95 to 1.31) | 1.00                | 0.93 (0.81 to 1.07) | 1.01 (0.87 to 1.19) | 1.49 (1.27 to 1.75) |
| Never smoker                                                                   |                     |                     |                     |                     |                     |                     |                     |
| No. of participants                                                            | 179                 | 374                 | 1550                | 2623                | 6299                | 3780                | 2596                |
| No. of deaths                                                                  | 79                  | 128                 | 511                 | 693                 | 1620                | 786                 | 477                 |
| Model 1                                                                        | 1.70 (1.20 to 2.42) | 1.04 (0.80 to 1.33) | 1.14 (0.95 to 1.36) | 1.00                | 0.95 (0.80 to 1.13) | 1.06 (0.90 to 1.24) | 1.28 (1.08 to 1.51) |

\* Complex survey designs are considered for all estimates. Among 36051 participants, a total of 2271 and 1469 participants were excluded due to missing values of BMI at age 25 years and at ten years before baseline respectively. Model 1 was adjusted for baseline age, sex, race, education level, marital status, family income- poverty ratio level, drinking and smoking status, leisure-time physical activity level, healthy eating index scores, self-reported health status and family history of diabetes or heart attack. Model 2 was additionally adjusted for baseline history of diabetes, hypertension, cardiovascular diseases, cancer and chronic obstructive pulmonary diseases.

<sup>†</sup>Participants with prevalent cardiovascular diseases, diabetes or cancer were excluded.

**Table F Hazard ratios (95% confidence intervals) of CVD mortality, heart disease mortality and stroke mortality with weight change patterns across adulthood in the NHANES 1988-2010\***

| Cause of death <sup>†</sup>                           | Weight change patterns |                     |                     |                     |                     |
|-------------------------------------------------------|------------------------|---------------------|---------------------|---------------------|---------------------|
|                                                       | Stable normal          | Maximum overweight  | Obese to non-obese  | Non-obese to obese  | Stable obese        |
| <b>From age 25 years to ten years before baseline</b> |                        |                     |                     |                     |                     |
| <i>CVD mortality</i>                                  |                        |                     |                     |                     |                     |
| No. of deaths                                         | 611                    | 859                 | 33                  | 397                 | 120                 |
| Model 1                                               | 1.00                   | 1.12 (0.97 to 1.31) | 0.98 (0.60 to 1.60) | 1.51 (1.26 to 1.81) | 2.44 (1.85 to 3.23) |
| Model 2                                               | 1.00                   | 1.15 (1.00 to 1.33) | 0.91 (0.56 to 1.47) | 1.53 (1.27 to 1.84) | 2.51 (1.92 to 3.27) |
| Model 3                                               | 1.00                   | 1.13 (0.97 to 1.30) | 0.84 (0.51 to 1.40) | 1.40 (1.16 to 1.69) | 2.23 (1.70 to 2.93) |
| <i>Heart disease mortality</i>                        |                        |                     |                     |                     |                     |
| No. of deaths                                         | 459                    | 654                 | 24                  | 311                 | 108                 |
| Model 1                                               | 1.00                   | 1.12 (0.96 to 1.31) | 0.84 (0.50 to 1.42) | 1.65 (1.34 to 2.03) | 2.86 (2.13 to 3.85) |
| Model 2                                               | 1.00                   | 1.15 (0.98 to 1.34) | 0.76 (0.45 to 1.28) | 1.66 (1.33 to 2.06) | 2.92 (2.20 to 3.88) |
| Model 3                                               | 1.00                   | 1.12 (0.96 to 1.32) | 0.68 (0.40 to 1.16) | 1.52 (1.22 to 1.89) | 2.57 (1.92 to 3.43) |
| <i>Stroke mortality</i>                               |                        |                     |                     |                     |                     |
| No. of deaths                                         | 152                    | 205                 | 9                   | 86                  | 12                  |
| Model 1                                               | 1.00                   | 1.14 (0.85 to 1.53) | 1.45 (0.56 to 3.77) | 1.06 (0.67 to 1.67) | 0.98 (0.42 to 2.30) |
| Model 2                                               | 1.00                   | 1.16 (0.88 to 1.55) | 1.48 (0.59 to 3.70) | 1.09 (0.70 to 1.70) | 1.04 (0.45 to 2.39) |
| Model 3                                               | 1.00                   | 1.15 (0.86 to 1.53) | 1.51 (0.59 to 3.85) | 1.02 (0.66 to 1.59) | 0.98 (0.42 to 2.25) |
| <b>From age 25 years to baseline</b>                  |                        |                     |                     |                     |                     |
| <i>CVD mortality</i>                                  |                        |                     |                     |                     |                     |
| No. of deaths                                         | 580                    | 860                 | 69                  | 466                 | 88                  |
| Model 1                                               | 1.00                   | 0.98 (0.83 to 1.16) | 1.40 (0.99 to 2.00) | 1.14 (0.96 to 1.36) | 2.00 (1.47 to 2.72) |
| Model 2                                               | 1.00                   | 1.00 (0.84 to 1.18) | 1.27 (0.88 to 1.84) | 1.15 (0.97 to 1.36) | 2.08 (1.56 to 2.78) |
| Model 3                                               | 1.00                   | 0.97 (0.82 to 1.16) | 1.16 (0.78 to 1.72) | 1.06 (0.89 to 1.27) | 1.87 (1.39 to 2.52) |
| <i>Heart disease mortality</i>                        |                        |                     |                     |                     |                     |
| No. of deaths                                         | 441                    | 653                 | 57                  | 359                 | 79                  |
| Model 1                                               | 1.00                   | 0.94 (0.78 to 1.13) | 1.42 (0.98 to 2.08) | 1.20 (1.00 to 1.44) | 2.28 (1.60 to 3.25) |
| Model 2                                               | 1.00                   | 0.95 (0.80 to 1.15) | 1.25 (0.84 to 1.85) | 1.20 (1.00 to 1.45) | 2.37 (1.68 to 3.33) |
| Model 3                                               | 1.00                   | 0.93 (0.77 to 1.13) | 1.11 (0.73 to 1.69) | 1.11 (0.92 to 1.34) | 2.10 (1.48 to 2.97) |
| <i>Stroke mortality</i>                               |                        |                     |                     |                     |                     |
| No. of deaths                                         | 139                    | 207                 | 12                  | 107                 | 9                   |
| Model 1                                               | 1.00                   | 1.13 (0.82 to 1.56) | 1.33 (0.53 to 3.32) | 0.93 (0.66 to 1.32) | 0.92 (0.39 to 2.15) |

|                                                   |      |                     |                     |                     |                     |
|---------------------------------------------------|------|---------------------|---------------------|---------------------|---------------------|
| Model 2                                           | 1.00 | 1.15 (0.83 to 1.59) | 1.33 (0.55 to 3.24) | 0.96 (0.68 to 1.34) | 0.99 (0.42 to 2.32) |
| Model 3                                           | 1.00 | 1.14 (0.82 to 1.60) | 1.33 (0.53 to 3.32) | 0.89 (0.62 to 1.28) | 0.93 (0.39 to 2.24) |
| <b>From ten years before baseline to baseline</b> |      |                     |                     |                     |                     |
| <b><i>CVD mortality</i></b>                       |      |                     |                     |                     |                     |
| No. of deaths                                     | 516  | 865                 | 218                 | 224                 | 346                 |
| Model 1                                           | 1.00 | 0.92 (0.79 to 1.07) | 1.69 (1.35 to 2.12) | 0.99 (0.79 to 1.25) | 1.43 (1.17 to 1.74) |
| Model 2                                           | 1.00 | 0.94 (0.81 to 1.10) | 1.65 (1.31 to 2.07) | 1.00 (0.80 to 1.26) | 1.47 (1.23 to 1.76) |
| Model 3                                           | 1.00 | 0.91 (0.78 to 1.06) | 1.50 (1.19 to 1.89) | 0.93 (0.74 to 1.18) | 1.33 (1.11 to 1.59) |
| <b><i>Heart disease mortality</i></b>             |      |                     |                     |                     |                     |
| No. of deaths                                     | 387  | 668                 | 168                 | 165                 | 287                 |
| Model 1                                           | 1.00 | 0.91 (0.77 to 1.09) | 1.75 (1.37 to 2.23) | 0.99 (0.79 to 1.26) | 1.62 (1.31 to 1.99) |
| Model 2                                           | 1.00 | 0.94 (0.79 to 1.11) | 1.69 (1.31 to 2.18) | 1.01 (0.80 to 1.27) | 1.66 (1.36 to 2.02) |
| Model 3                                           | 1.00 | 0.91 (0.76 to 1.07) | 1.52 (1.16 to 1.98) | 0.93 (0.74 to 1.18) | 1.49 (1.23 to 1.81) |
| <b><i>Stroke mortality</i></b>                    |      |                     |                     |                     |                     |
| No. of deaths                                     | 129  | 197                 | 50                  | 59                  | 59                  |
| Model 1                                           | 1.00 | 0.93 (0.71 to 1.23) | 1.50 (0.81 to 2.81) | 0.98 (0.65 to 1.47) | 0.78 (0.50 to 1.24) |
| Model 2                                           | 1.00 | 0.95 (0.73 to 1.24) | 1.53 (0.85 to 2.75) | 0.99 (0.66 to 1.49) | 0.82 (0.53 to 1.27) |
| Model 3                                           | 1.00 | 0.93 (0.70 to 1.24) | 1.50 (0.82 to 2.74) | 0.93 (0.60 to 1.44) | 0.78 (0.49 to 1.24) |

\*Complex survey designs are considered for all estimates. Model 1 was adjusted for baseline age, sex, race/ethnicity. Model 2 was additionally adjusted for education level, family income-poverty ratio level, marital status, drinking and smoking status and family history of diabetes or heart attack. Model 3 was further adjusted for baseline leisure-time physical activity level, healthy eating index scores and self-reported general health.

†Deaths were followed up to 31<sup>st</sup> December 2011.

**Table G Hazard ratios (95% confidence intervals) of mortality with weight change patterns across adulthood in the NHANES 1988-2014 with further adjustment of baseline disease status\***

| Cause of death <sup>†</sup>                           | Weight change patterns |                     |                     |                     |                     |
|-------------------------------------------------------|------------------------|---------------------|---------------------|---------------------|---------------------|
|                                                       | Stable normal          | Maximum overweight  | Obese to non-obese  | Non-obese to obese  | Stable obese        |
| <b>From age 25 years to ten years before baseline</b> |                        |                     |                     |                     |                     |
| <i>All cause</i>                                      |                        |                     |                     |                     |                     |
| No. of deaths/Person-years                            | 3075/132 955           | 3821/126 939        | 159/3688            | 1827/54 259         | 516/16 133          |
| Hazard ratio (95% confidence interval)                | 1.00                   | 1.02 (0.94 to 1.10) | 1.18 (0.82 to 1.67) | 1.11 (1.01 to 1.22) | 1.47 (1.27 to 1.70) |
| <i>Heart diseases</i>                                 |                        |                     |                     |                     |                     |
| No. of deaths                                         | 569                    | 862                 | 33                  | 409                 | 139                 |
| Hazard ratio (95% confidence interval)                | 1.00                   | 1.13 (0.97 to 1.31) | 0.84 (0.49 to 1.44) | 1.29 (1.04 to 1.60) | 1.97 (1.49 to 2.62) |
| <i>Cancer</i>                                         |                        |                     |                     |                     |                     |
| No. of deaths                                         | 787                    | 868                 | 27                  | 378                 | 90                  |
| Hazard ratio (95% confidence interval)                | 1.00                   | 1.00 (0.86 to 1.16) | 0.95 (0.51 to 1.75) | 1.18 (0.94 to 1.48) | 1.09 (0.85 to 1.40) |
| <i>Other causes</i>                                   |                        |                     |                     |                     |                     |
| No. of deaths                                         | 1719                   | 2091                | 99                  | 1040                | 287                 |
| Hazard ratio (95% confidence interval)                | 1.00                   | 1.03 (0.94 to 1.12) | 1.46 (0.95 to 2.25) | 1.13 (1.00 to 1.28) | 1.74 (1.41 to 2.16) |
| <b>From age 25 years to baseline</b>                  |                        |                     |                     |                     |                     |
| <i>All cause</i>                                      |                        |                     |                     |                     |                     |
| No. of deaths/Person-years                            | 2677/87 892            | 3915/131 968        | 264/4923            | 2302/98 464         | 423/15 156          |
| Hazard ratio (95% confidence interval)                | 1.00                   | 0.91 (0.82 to 0.99) | 1.07 (0.80 to 1.42) | 0.95 (0.86 to 1.04) | 1.38 (1.19 to 1.61) |
| <i>Heart diseases</i>                                 |                        |                     |                     |                     |                     |
| No. of deaths                                         | 534                    | 846                 | 66                  | 498                 | 110                 |
| Hazard ratio (95% confidence interval)                | 1.00                   | 0.93 (0.77 to 1.11) | 0.91 (0.58 to 1.43) | 1.00 (0.84 to 1.19) | 1.72 (1.27 to 2.33) |
| <i>Cancer</i>                                         |                        |                     |                     |                     |                     |
| No. of deaths                                         | 604                    | 919                 | 47                  | 545                 | 73                  |
| Hazard ratio (95% confidence interval)                | 1.00                   | 0.96 (0.82 to 1.13) | 0.88 (0.57 to 1.37) | 1.06 (0.92 to 1.21) | 1.09 (0.80 to 1.48) |
| <i>Other causes</i>                                   |                        |                     |                     |                     |                     |
| No. of deaths                                         | 1539                   | 2150                | 151                 | 1259                | 240                 |
| Hazard ratio (95% confidence interval)                | 1.00                   | 0.89 (0.80 to 0.99) | 1.28 (0.91 to 1.79) | 0.96 (0.84 to 1.09) | 1.64 (1.32 to 2.03) |
| <b>From ten years before baseline to baseline</b>     |                        |                     |                     |                     |                     |
| <i>All cause</i>                                      |                        |                     |                     |                     |                     |
| No. of deaths/Person-years                            | 2362/81 771            | 3924/131 762        | 852/16 428          | 1137/58 251         | 1652/56 972         |
| Hazard ratio (95% confidence interval)                | 1.00                   | 0.91 (0.82 to 1.00) | 1.17 (1.04 to 1.31) | 0.95 (0.82 to 1.09) | 1.07 (0.97 to 1.18) |

**Heart diseases**

|                                        |      |                     |                     |                     |                     |
|----------------------------------------|------|---------------------|---------------------|---------------------|---------------------|
| No. of deaths                          | 462  | 851                 | 207                 | 243                 | 382                 |
| Hazard ratio (95% confidence interval) | 1.00 | 0.89 (0.74 to 1.06) | 1.29 (0.98 to 1.70) | 0.93 (0.77 to 1.13) | 1.21 (0.98 to 1.49) |

**Cancer**

|                                        |      |                     |                     |                     |                     |
|----------------------------------------|------|---------------------|---------------------|---------------------|---------------------|
| No. of deaths                          | 567  | 892                 | 138                 | 273                 | 354                 |
| Hazard ratio (95% confidence interval) | 1.00 | 0.95 (0.78 to 1.14) | 1.06 (0.81 to 1.37) | 0.96 (0.75 to 1.21) | 1.16 (0.97 to 1.39) |

**Other causes**

|                                        |      |                     |                     |                     |                     |
|----------------------------------------|------|---------------------|---------------------|---------------------|---------------------|
| No. of deaths                          | 1333 | 2181                | 507                 | 621                 | 916                 |
| Hazard ratio (95% confidence interval) | 1.00 | 0.92 (0.83 to 1.03) | 1.30 (1.10 to 1.53) | 1.02 (0.85 to 1.22) | 1.12 (0.98 to 1.28) |

\* Complex survey designs are considered for all estimates. A total of 2751, 2271, 1469 participants were excluded in analyses from age 25 years to ten years before baseline, age 25 years to baseline, ten years before baseline to baseline respectively due to missing values of BMI at both times.

† For all cause mortality, risk estimates were adjusted for baseline age, sex, race/ethnicity, education level, family income-poverty ratio level, marital status, drinking and smoking status, leisure-time physical activity level, healthy eating index scores, self-reported health status and family history of diabetes or heart attack and baseline history of diabetes, hypertension, cardiovascular diseases, cancer and chronic obstructive pulmonary diseases. For heart disease mortality, risk estimates were adjusted for baseline age, sex, race/ethnicity, education level, family income-poverty ratio level, marital status, drinking and smoking status, leisure-time physical activity level, healthy eating index scores, self-reported health status, family history of diabetes or heart attack and baseline history of diabetes, hypertension, cancer and chronic obstructive pulmonary diseases. For cancer mortality, risk estimates were adjusted for baseline age, sex, race/ethnicity, education level, family income-poverty ratio level, marital status, drinking and smoking status, leisure-time physical activity level, healthy eating index scores, self-reported health status, family history of diabetes or heart attack and baseline history of diabetes, hypertension, cardiovascular diseases and chronic obstructive pulmonary diseases. For other causes mortality, risk estimates were adjusted for baseline age, sex, race/ethnicity, education level, family income-poverty ratio level, marital status, drinking and smoking status, leisure-time physical activity level, healthy eating index scores, self-reported health status, family history of diabetes or heart attack and baseline history of cardiovascular diseases and cancer.

**Table H Sensitivity analyses of the associations between weight change patterns across adulthood and risks of all cause mortality in the NHANES 1988-2014 \***

|                                                       | Weight change patterns |                     |                     |                     |                     |
|-------------------------------------------------------|------------------------|---------------------|---------------------|---------------------|---------------------|
|                                                       | Stable Normal          | Maximum overweight  | Obese to non-obese  | Non-obese to obese  | Stable obese        |
| <b>From age 25 years to ten years before baseline</b> |                        |                     |                     |                     |                     |
| All participants                                      |                        |                     |                     |                     |                     |
| No. of deaths                                         | 3075                   | 3821                | 159                 | 1827                | 516                 |
| Hazard ratio (95% confidence interval)                | 1.00                   | 1.05 (0.98 to 1.12) | 1.22 (0.87 to 1.69) | 1.22 (1.11 to 1.33) | 1.72 (1.52 to 1.95) |
| Sensitivity analysis 1 <sup>†</sup>                   |                        |                     |                     |                     |                     |
| No. of deaths                                         | 2477                   | 3092                | 133                 | 1503                | 426                 |
| Hazard ratio (95% confidence interval)                | 1.00                   | 1.01 (0.94 to 1.09) | 1.17 (0.82 to 1.68) | 1.21 (1.09 to 1.35) | 1.69 (1.47 to 1.94) |
| Sensitivity analysis 2 <sup>‡</sup>                   |                        |                     |                     |                     |                     |
| No. of deaths                                         | 2734                   | 3713                | 158                 | 1778                | 516                 |
| Hazard ratio (95% confidence interval)                | 1.00                   | 1.06 (0.99 to 1.14) | 1.24 (0.89 to 1.72) | 1.23 (1.11 to 1.36) | 1.74 (1.54 to 1.96) |
| Sensitivity analysis 3 <sup>§</sup>                   |                        |                     |                     |                     |                     |
| No. of deaths                                         | 2585                   | 3097                | 127                 | 1454                | 398                 |
| Hazard ratio (95% confidence interval)                | 1.00                   | 1.02 (0.95 to 1.11) | 1.25 (0.87 to 1.80) | 1.22 (1.10 to 1.35) | 1.81 (1.59 to 2.07) |
| Sensitivity analysis 4 <sup>  </sup>                  |                        |                     |                     |                     |                     |
| No. of deaths                                         | 2571                   | 3028                | 115                 | 1308                | 359                 |
| Hazard ratio (95% confidence interval)                | 1.00                   | 1.04 (0.97 to 1.11) | 1.34 (1.00 to 1.81) | 1.21 (1.09 to 1.34) | 1.83 (1.60 to 2.10) |
| <b>From age 25 years to baseline</b>                  |                        |                     |                     |                     |                     |
| All participants                                      |                        |                     |                     |                     |                     |
| No. of deaths                                         | 2677                   | 3915                | 264                 | 2302                | 423                 |
| Hazard ratio (95% confidence interval)                | 1.00                   | 0.92 (0.84 to 1.00) | 1.13 (0.86 to 1.49) | 1.01 (0.92 to 1.11) | 1.61 (1.41 to 1.84) |
| Sensitivity analysis 1 <sup>†</sup>                   |                        |                     |                     |                     |                     |
| No. of deaths                                         | 2135                   | 3179                | 211                 | 1881                | 358                 |
| Hazard ratio (95% confidence interval)                | 1.00                   | 0.93 (0.84 to 1.04) | 1.10 (0.81 to 1.50) | 1.04 (0.94 to 1.15) | 1.66 (1.43 to 1.92) |
| Sensitivity analysis 2 <sup>‡</sup>                   |                        |                     |                     |                     |                     |
| No. of deaths                                         | 2253                   | 3750                | 262                 | 2228                | 423                 |
| Hazard ratio (95% confidence interval)                | 1.00                   | 0.94 (0.86 to 1.03) | 1.16 (0.88 to 1.53) | 1.03 (0.93 to 1.14) | 1.64 (1.44 to 1.87) |
| Sensitivity analysis 3 <sup>§</sup>                   |                        |                     |                     |                     |                     |
| No. of deaths                                         | 2172                   | 3187                | 188                 | 1923                | 343                 |
| Hazard ratio (95% confidence interval)                | 1.00                   | 0.91 (0.82 to 1.00) | 1.14 (0.83 to 1.57) | 1.04 (0.94 to 1.15) | 1.73 (1.51 to 1.99) |
| Sensitivity analysis 4 <sup>  </sup>                  |                        |                     |                     |                     |                     |
| No. of deaths                                         | 1610                   | 2143                | 115                 | 1145                | 160                 |
| Hazard ratio (95% confidence interval)                | 1.00                   | 0.89 (0.79 to 0.99) | 1.38 (0.99 to 1.92) | 1.02 (0.90 to 1.16) | 1.76 (1.45 to 2.13) |

**From ten years before baseline to baseline**

|                                        |      |                     |                     |                     |                     |
|----------------------------------------|------|---------------------|---------------------|---------------------|---------------------|
| All participants                       |      |                     |                     |                     |                     |
| No. of deaths                          | 2362 | 3924                | 852                 | 1137                | 1652                |
| Hazard ratio (95% confidence interval) | 1.00 | 0.93 (0.84 to 1.02) | 1.30 (1.16 to 1.45) | 1.01 (0.88 to 1.15) | 1.20 (1.09 to 1.32) |
| Sensitivity analysis 1 <sup>†</sup>    |      |                     |                     |                     |                     |
| No. of deaths                          | 1869 | 3137                | 692                 | 934                 | 1350                |
| Hazard ratio (95% confidence interval) | 1.00 | 0.93 (0.84 to 1.02) | 1.30 (1.15 to 1.46) | 1.02 (0.88 to 1.18) | 1.22 (1.10 to 1.36) |
| Sensitivity analysis 2 <sup>‡</sup>    |      |                     |                     |                     |                     |
| No. of deaths                          | 2071 | 3887                | 848                 | 1132                | 1652                |
| Hazard ratio (95% confidence interval) | 1.00 | 0.96 (0.87 to 1.06) | 1.35 (1.20 to 1.53) | 1.05 (0.92 to 1.20) | 1.25 (1.13 to 1.38) |
| Sensitivity analysis 3 <sup>§</sup>    |      |                     |                     |                     |                     |
| No. of deaths                          | 1940 | 3172                | 634                 | 982                 | 1335                |
| Hazard ratio (95% confidence interval) | 1.00 | 0.91 (0.81 to 1.02) | 1.30 (1.13 to 1.48) | 1.04 (0.89 to 1.22) | 1.22 (1.10 to 1.36) |
| Sensitivity analysis 4 <sup>¶</sup>    |      |                     |                     |                     |                     |
| No. of deaths                          | 1506 | 2166                | 335                 | 639                 | 691                 |
| Hazard ratio (95% confidence interval) | 1.00 | 0.87 (0.77 to 0.97) | 1.26 (1.02 to 1.55) | 1.00 (0.83 to 1.21) | 1.17 (1.03 to 1.32) |

\*Complex survey designs are considered for all estimates. Risk estimates were adjusted for baseline age, sex, race/ethnicity, education level, family income-poverty ratio level, marital status, drinking and smoking status, family history of diabetes or heart attack, leisure-time physical activity level, healthy eating index scores and self-reported general health.

<sup>†</sup>Participants with any missing values for covariates were excluded. A total of 8460, 8111 and 7620 participants were further excluded in analyses from age 25 years to ten years before baseline, age 25 years to baseline, ten years before baseline to baseline respectively due to missing information on covariates.

<sup>‡</sup>Underweight participants were excluded. A total of 2020, 2289 and 946 participants were further excluded in analyses from age 25 years to ten years before baseline, age 25 years to baseline, ten years before baseline to baseline respectively due to being underweight at either time point during the weight change intervals.

<sup>§</sup>Participants with less than three years of follow-up were excluded. A total of 5027, 5100 and 5265 participants were further excluded in analyses from age 25 years to ten years before baseline, age 25 years to baseline, ten years before baseline to baseline respectively due to less than three years of follow up.

<sup>¶</sup>Participants with prevalent cardiovascular diseases, diabetes or cancer were excluded. A total of 4584 participants were further excluded in analyses from age 25 years to ten years before baseline due to having prevalent cardiovascular diseases, diabetes or cancer diagnosed at ten years before baseline. A total of 10 663 participants were excluded in analyses from age 25 years to baseline due to having prevalent cardiovascular diseases, diabetes or cancer diagnosed at baseline. A total of 10 994 participants were excluded in analyses from ten years before baseline to baseline due to having prevalent cardiovascular diseases, diabetes or cancer at baseline.



**Table I Hazard ratios (95% confidence intervals) of all cause mortality with weight change patterns stratified by age at death among participants younger than 65 years old at baseline in the NHANES 1988-2014\***

|                                                       | <b>Weight change patterns</b> |                           |                           |                           |                     |
|-------------------------------------------------------|-------------------------------|---------------------------|---------------------------|---------------------------|---------------------|
|                                                       | <b>Stable Normal</b>          | <b>Maximum overweight</b> | <b>Obese to non-obese</b> | <b>Non-obese to obese</b> | <b>Stable obese</b> |
| <b>From age 25 years to ten years before baseline</b> |                               |                           |                           |                           |                     |
| Stratified by death age group                         |                               |                           |                           |                           |                     |
| Dead before 65y                                       |                               |                           |                           |                           |                     |
| No. of deaths                                         | 516                           | 448                       | 22                        | 231                       | 138                 |
| Multivariable-adjusted HR (95% CI)                    | 1.00                          | 1.12 (0.94 to 1.33)       | 1.73 (0.93 to 3.21)       | 1.32 (1.07 to 1.63)       | 1.69 (1.38 to 2.08) |
| Dead before 70y                                       |                               |                           |                           |                           |                     |
| No. of deaths                                         | 713                           | 665                       | 32                        | 349                       | 176                 |
| Multivariable-adjusted HR (95% CI)                    | 1.00                          | 1.08 (0.92 to 1.25)       | 1.65 (0.90 to 3.02)       | 1.12 (0.93 to 1.34)       | 1.70 (1.39 to 2.09) |
| Dead before 75y                                       |                               |                           |                           |                           |                     |
| No. of deaths                                         | 868                           | 852                       | 38                        | 451                       | 207                 |
| Multivariable-adjusted HR (95% CI)                    | 1.00                          | 1.15 (1.02 to 1.30)       | 1.63 (0.95 to 2.81)       | 1.18 (1.01 to 1.38)       | 1.95 (1.60 to 2.36) |
| Dead before 80y                                       |                               |                           |                           |                           |                     |
| No. of deaths                                         | 989                           | 1000                      | 39                        | 520                       | 227                 |
| Multivariable-adjusted HR (95% CI)                    | 1.00                          | 1.16 (1.03 to 1.31)       | 0.94 (0.33 to 2.73)       | 1.28 (1.10 to 1.50)       | 1.85 (1.53 to 2.24) |
| <b>From age 25 years to baseline</b>                  |                               |                           |                           |                           |                     |
| Stratified by death age group                         |                               |                           |                           |                           |                     |
| Dead before 65y                                       |                               |                           |                           |                           |                     |
| No. of deaths                                         | 334                           | 469                       | 44                        | 416                       | 120                 |
| Multivariable-adjusted HR (95% CI)                    | 1.00                          | 0.88 (0.69 to 1.12)       | 1.29 (0.84 to 1.98)       | 1.05 (0.84 to 1.32)       | 1.57 (1.21 to 2.01) |
| Dead before 70y                                       |                               |                           |                           |                           |                     |
| No. of deaths                                         | 480                           | 685                       | 55                        | 592                       | 157                 |
| Multivariable-adjusted HR (95% CI)                    | 1.00                          | 0.87 (0.73 to 1.04)       | 1.35 (0.89 to 2.06)       | 0.99 (0.84 to 1.18)       | 1.59 (1.29 to 1.95) |
| Dead before 75y                                       |                               |                           |                           |                           |                     |
| No. of deaths                                         | 601                           | 871                       | 64                        | 737                       | 186                 |
| Multivariable-adjusted HR (95% CI)                    | 1.00                          | 0.95 (0.80 to 1.12)       | 1.44 (0.93 to 2.23)       | 1.05 (0.89 to 1.23)       | 1.80 (1.47 to 2.21) |
| Dead before 80y                                       |                               |                           |                           |                           |                     |
| No. of deaths                                         | 693                           | 1003                      | 68                        | 860                       | 203                 |
| Multivariable-adjusted HR (95% CI)                    | 1.00                          | 0.95 (0.83 to 1.09)       | 0.82 (0.35 to 1.91)       | 1.09 (0.95 to 1.26)       | 1.75 (1.41 to 2.17) |
| <b>From ten years before baseline to baseline</b>     |                               |                           |                           |                           |                     |
| Stratified by death age group                         |                               |                           |                           |                           |                     |
| Dead before 65y                                       |                               |                           |                           |                           |                     |

|                                    |      |                     |                     |                     |                     |
|------------------------------------|------|---------------------|---------------------|---------------------|---------------------|
| No. of deaths                      | 307  | 455                 | 98                  | 254                 | 280                 |
| Multivariable-adjusted HR (95% CI) | 1.00 | 0.87 (0.68 to 1.11) | 1.54 (1.07 to 2.20) | 1.06 (0.80 to 1.42) | 1.24 (0.98 to 1.58) |
| Dead before 70y                    |      |                     |                     |                     |                     |
| No. of deaths                      | 436  | 673                 | 140                 | 350                 | 403                 |
| Multivariable-adjusted HR (95% CI) | 1.00 | 0.89 (0.74 to 1.06) | 1.29 (0.94 to 1.76) | 1.06 (0.86 to 1.29) | 1.13 (0.95 to 1.34) |
| Dead before 75y                    |      |                     |                     |                     |                     |
| No. of deaths                      | 539  | 849                 | 180                 | 426                 | 502                 |
| Multivariable-adjusted HR (95% CI) | 1.00 | 0.98 (0.82 to 1.18) | 1.32 (1.00 to 1.74) | 1.10 (0.89 to 1.36) | 1.25 (1.08 to 1.45) |
| Dead before 80y                    |      |                     |                     |                     |                     |
| No. of deaths                      | 626  | 973                 | 203                 | 499                 | 570                 |
| Multivariable-adjusted HR (95% CI) | 1.00 | 0.96 (0.80 to 1.15) | 1.39 (1.05 to 1.85) | 1.12 (0.92 to 1.35) | 1.31 (1.12 to 1.55) |

\*Complex survey designs are considered for all estimates. Risk estimates were adjusted for baseline age, sex, race/ethnicity, education level, family income-poverty ratio level, marital status, drinking and smoking status, family history of diabetes or heart attack, leisure-time physical activity level, healthy eating index scores and self-reported general health.

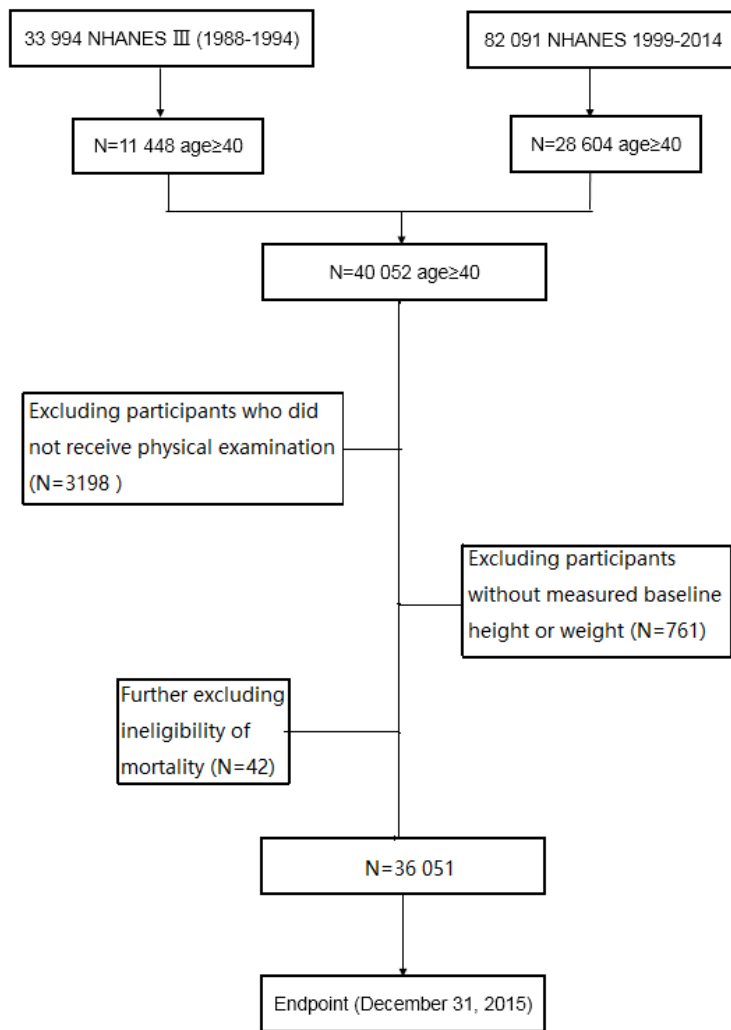

**Figure A Flow chart of inclusion and exclusion of study participants**

**Association between fine weight change patterns and all-cause mortality**

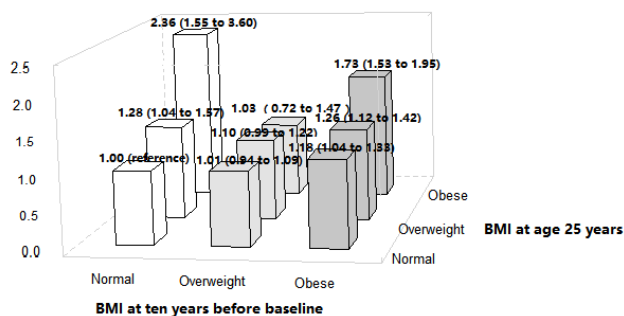

**No. of deaths/participants**

**BMI at ten years before baseline**

| BMI at age 25 years                       | Normal (<25.0 kg/m <sup>2</sup> ) | Overweight (25.0-29.9 kg/m <sup>2</sup> ) | Obese (≥30.0 kg/m <sup>2</sup> ) |
|-------------------------------------------|-----------------------------------|-------------------------------------------|----------------------------------|
| Normal (<25.0 kg/m <sup>2</sup> )         | 3075/12 514                       | 2421/8236                                 | 961/2937                         |
| Overweight (25.0-30.0 kg/m <sup>2</sup> ) | 219/517                           | 1181/4007                                 | 866/3146                         |
| Obese (≥30.0 kg/m <sup>2</sup> )          | 22/71                             | 137/328                                   | 516/1904                         |

**Association between fine weight change patterns and all-cause mortality**

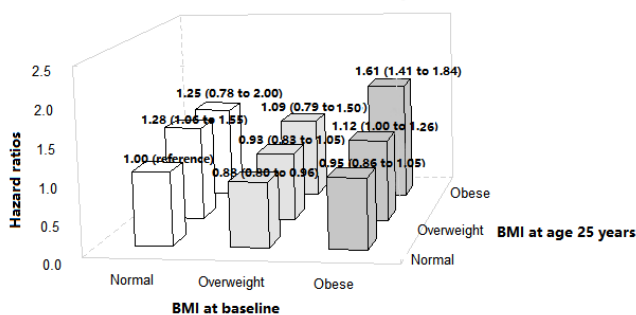

**No. of deaths/participants**

**BMI at baseline**

| BMI at age 25 years                       | Normal (<25.0 kg/m <sup>2</sup> ) | Overweight (25.0-29.9 kg/m <sup>2</sup> ) | Obese (≥30.0 kg/m <sup>2</sup> ) |
|-------------------------------------------|-----------------------------------|-------------------------------------------|----------------------------------|
| Normal (<25.0 kg/m <sup>2</sup> )         | 2677/8529                         | 2532/9209                                 | 1380/5922                        |
| Overweight (25.0-30.0 kg/m <sup>2</sup> ) | 512/1001                          | 871/2745                                  | 922/4034                         |
| Obese (≥30.0 kg/m <sup>2</sup> )          | 81/154                            | 183/436                                   | 423/1750                         |

**Association between fine weight change patterns and all-cause mortality**

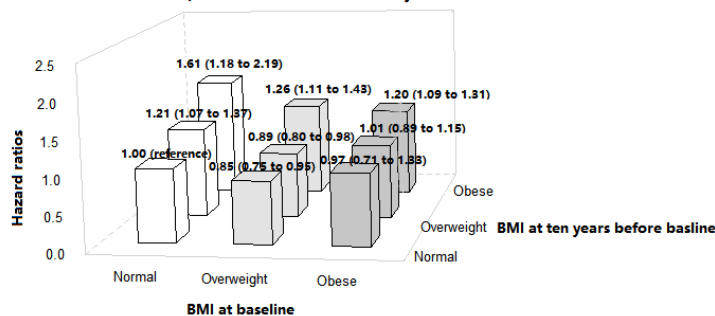

**No. of deaths/participants**

**BMI at baseline**

| BMI at ten years before baseline          | Normal (<25.0 kg/m <sup>2</sup> ) | Overweight (25.0-29.9 kg/m <sup>2</sup> ) | Obese (≥30.0 kg/m <sup>2</sup> ) |
|-------------------------------------------|-----------------------------------|-------------------------------------------|----------------------------------|
| Normal (<25.0 kg/m <sup>2</sup> )         | 2362/7785                         | 905/4224                                  | 215/1139                         |
| Overweight (25.0-30.0 kg/m <sup>2</sup> ) | 913/1934                          | 2106/6774                                 | 922/4363                         |
| Obese (≥30.0 kg/m <sup>2</sup> )          | 151/268                           | 701/1714                                  | 1652/6381                        |

Figure B Association between fine weight change patterns across adulthood and all cause mortality in the NHANES 1988-2014. All risk estimates were calculated using multivariable Cox regression adjusted for baseline age, sex, race/ethnicity, education level, family income-poverty ratio level, marital status, drinking and smoking status, leisure-time physical activity level, healthy eating index scores, self-reported health status and family history of diabetes or heart attack.

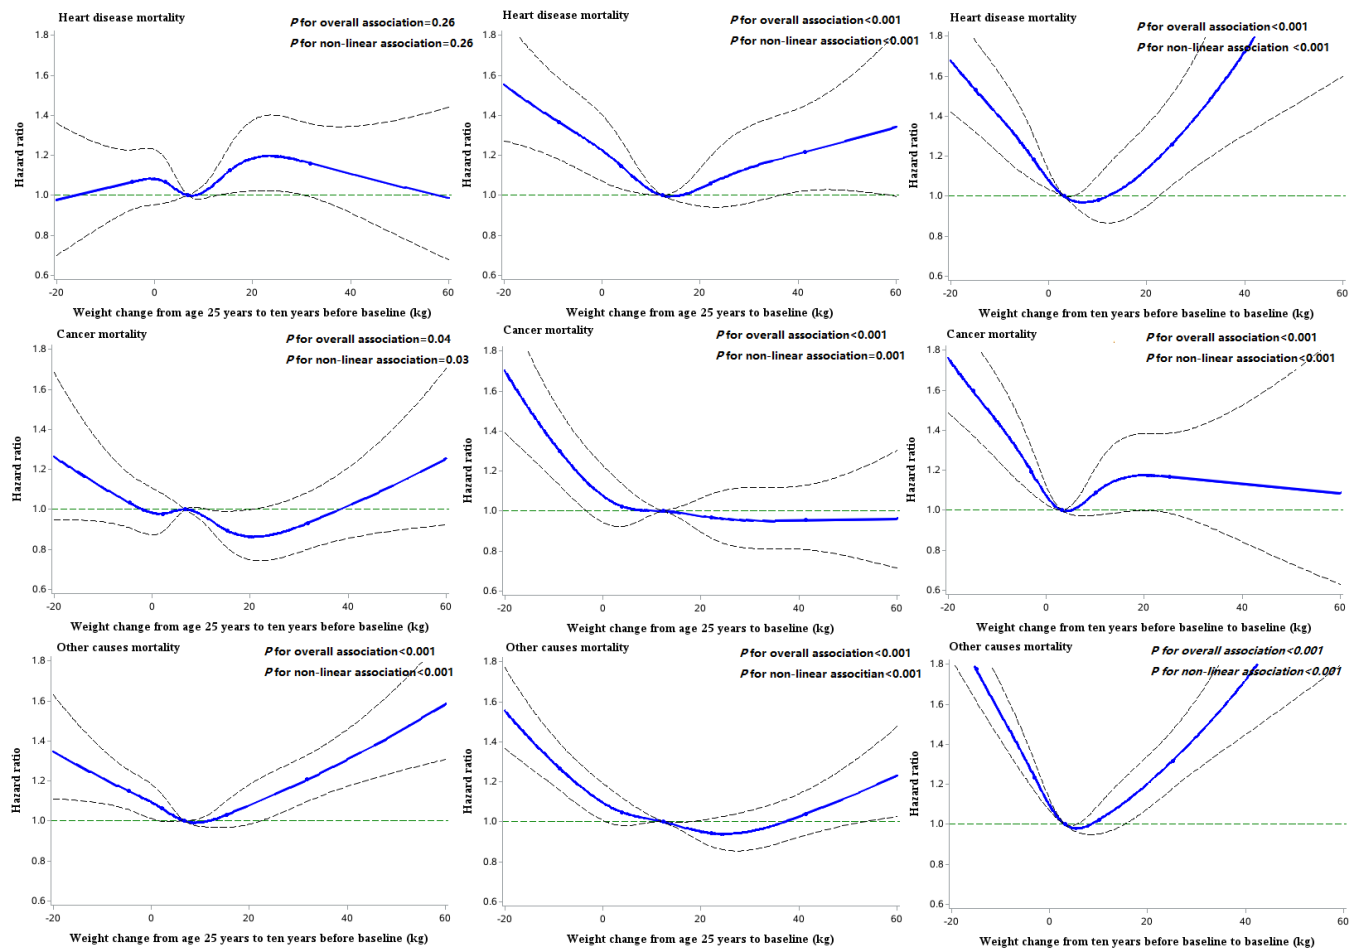

Figure C Dose response association between weight change across adulthood and risk of cause specific mortality in the NHANES 1988-2014. Associations were examined by multivariable Cox regression based on restricted cubic splines. Dash line represents estimates of hazard ratios and dotted line represents 95% confidence intervals. Risk estimates were adjusted for baseline age, sex, race/ethnicity, education level, family income-poverty ratio level, marital status, drinking and smoking status, leisure-time physical activity level, healthy eating index scores, self-reported health status and family history of diabetes or heart attack. For weight change from age 25 years to ten years before baseline or to baseline, weight at age 25 and baseline height were also adjusted. For weight change from ten years before baseline to baseline, weight at 10 years ago and baseline height were adjusted.
